# Supplementary material for: A novel carbon nanotube modified scaffold as an efficient biocathode material for improved microbial electrosynthesis
Source: Royal Society of Chemistry journal article supplement (doi:10.1039/c4ta03101f), 2014-01-01
Supplement: c4ta03101f1.pdf [file c4ta03101f1.pdf]

## SUPPORTING INFORMATION for

### **A novel carbon nanotube modified scaffold as an efficient biocathode material for improved microbial electrosynthesis**

Ludovic Jourdin<sup>\*a,b</sup>, Stefano Freguia<sup>a,b</sup>, Bogdan C. Donose<sup>a,b</sup>, Jun Chen<sup>c</sup>, Gordon G. Wallace<sup>c</sup>, Jurg Keller<sup>a</sup>, and Victoria Flexer<sup>\*a,‡</sup>

<sup>a</sup> The University of Queensland, Advanced Water Management Centre, Level 4, Gehrmann Building (60), Brisbane, QLD 4072, Australia

<sup>b</sup> Centre for Microbial Electrosynthesis, Gehrmann Building, The University of Queensland, Brisbane, Queensland 4072, Australia.

<sup>c</sup> ARC Centre of Excellence for Electromaterials Science, Intelligent Polymer Research Institute, AIIM Facility, Innovation Campus, University of Wollongong, NSW, 2522, Australia

‡ Present address: Department of Analytical Chemistry, Ghent University, Krijgslaan 281 S12, Ghent 9000 BELGIUM

\*Dr Victoria Flexer: [victoria.flexer@ugent.be](mailto:victoria.flexer@ugent.be)

\*Ludovic Jourdin: [l.jourdin@awmc.uq.edu.au](mailto:l.jourdin@awmc.uq.edu.au)

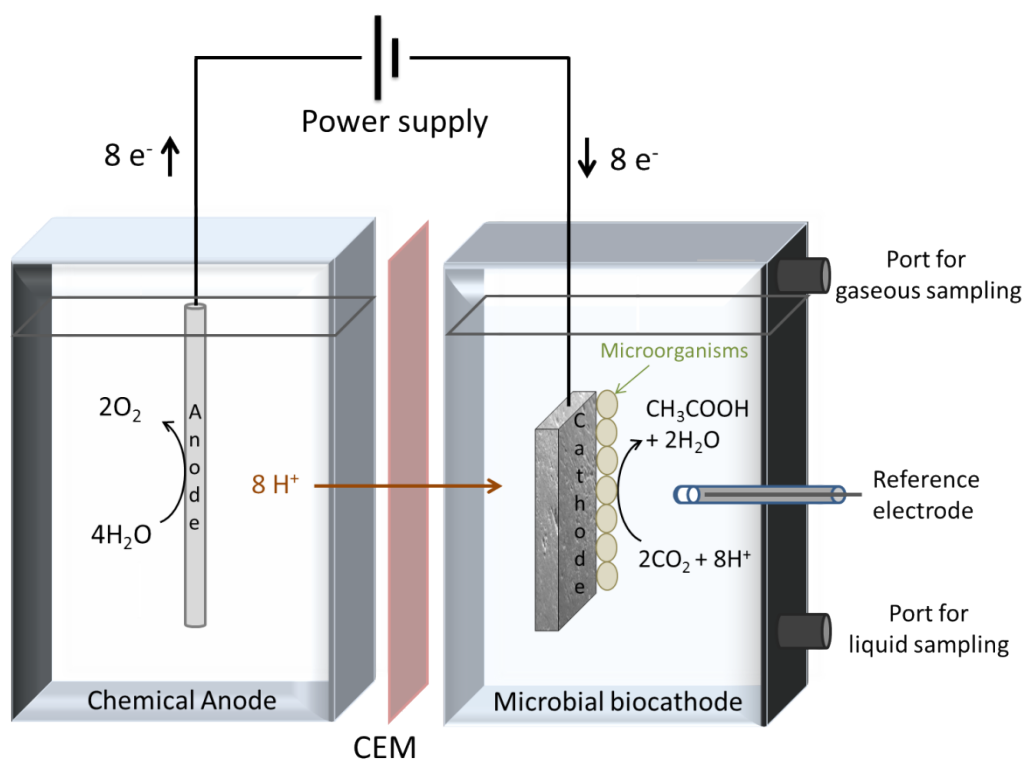

**Figure S1:** Schematic illustration of a microbial electrosynthesis cell – carbon dioxide microbial reduction to acetate.

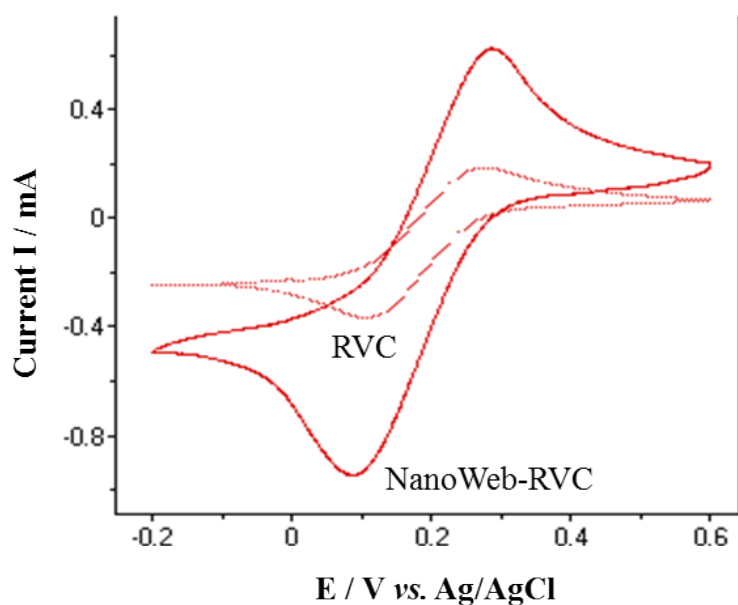

**Figure S2:** Cyclic voltammogram of ferricyanide on NanoWeb-RVC and non-modified RVC. Experiments performed in a standard three-electrode cell with a 0.1M  $\text{NaNO}_3$  solution containing 10mM ferricyanide at a scan rate of  $5 \text{ mV s}^{-1}$ .
